# Supplementary material for: Prevalence and clinical significance of VHL mutations and 3p25 deletions in renal tumor subtypes
Source: PubMed Central journal article supplement (PMC6980626; doi:10.18632/oncotarget.27428), 2020-01-21
Supplement: oncotarget-11-237-s001.pdf [file oncotarget-11-237-s001.pdf]

## Prevalence and clinical significance of VHL mutations and 3p25 deletions in renal tumor subtypes

### SUPPLEMENTARY MATERIALS

**Supplementary Table 1: Listing of the specific primers directed against VHL EXON 1–3 in renal cell carcinomas (RCC)**

|                      | Pimer selection        |
|----------------------|------------------------|
| <b>EXON 1</b>        |                        |
| VHL Exon 1.1 forward | GAAGACTACGGAGGTCGA     |
| VHL Exon 1.1 reverse | CGATTGCAGAAGATGACCT    |
| VHL Exon 1.2 forward | GAAGAAGACGGCGGGGAG     |
| VHL Exon 1.2 reverse | TTCAGACCGTGCTATCGT     |
| <b>EXON 2</b>        |                        |
| VHL Exon 2 forward   | CGGTGTGGCTCTTAAACA     |
| VHL Exon 2 reverse   | TGTACTIONACCACAACAACCT |
| <b>EXON 3</b>        |                        |
| VHL Exon 3 forward   | CCTCTTGTTTCGTTTCCTTGTA |
| VHL Exon 3 reverse   | TCAGTACCATCAAAAGCTGA   |
